# Supplementary material for: Constructing tri-coordinated Al (AlIII) sites to boost complete propane oxidation of the Pt/Al2O3 catalyst
Source: Royal Society of Chemistry journal article supplement (doi:10.1039/d4cy00582a), 2024-01-01
Supplement: d4cy00582a1.pdf [file d4cy00582a1.pdf]

## Appendix A. Supplementary Information

### Constructing Tri-coordinated Al (Al<sub>III</sub>) Sites to Boost Complete Propane Oxidation of Pt/Al<sub>2</sub>O<sub>3</sub> Catalyst

*Yang You<sup>a, b</sup>, Aijie Xu<sup>b</sup>, Yao Lv<sup>a</sup>, Lide Yang<sup>c</sup>, Xuan Tang<sup>a, b\*</sup>, Jie Tang<sup>c</sup>, Yanglong Guo<sup>b</sup>, Yao Cui<sup>c</sup>, Wangcheng Zhan<sup>b</sup>, Li Wang<sup>b</sup>, Yun Guo<sup>b\*</sup>, Sheng Dai<sup>a, b\*</sup>*

<sup>a</sup> Feringa Nobel Prize Scientist Joint Research Center, Frontiers Science Center for Materiobiology and Dynamic Chemistry, East China University of Science and Technology, Shanghai 200237, P. R. China

<sup>b</sup> State Key Laboratory of Green Chemical Engineering and Industrial Catalysis, Research Institute of Industrial Catalysis, School of Chemistry and Molecular Engineering, East China University of Science and Technology, Shanghai 200237, P. R. China

<sup>c</sup> Shanghai HuaYi New Material Co., Ltd., Shanghai, 201507, P. R. China

\*To whom correspondence should be addressed: [xuantang@mail.ecust.edu.cn](mailto:xuantang@mail.ecust.edu.cn) (Xuan Tang); [yunguo@ecust.edu.cn](mailto:yunguo@ecust.edu.cn) (Yun Guo); [shengdai@ecust.edu.cn](mailto:shengdai@ecust.edu.cn) (Sheng Dai)

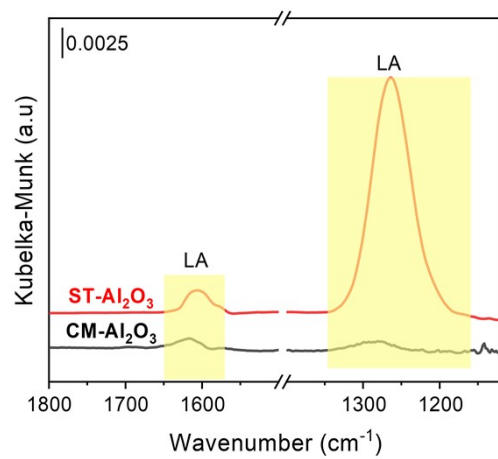

Fig. S1. NH<sub>3</sub>-FTIR spectra of CM-Al<sub>2</sub>O<sub>3</sub> and ST-Al<sub>2</sub>O<sub>3</sub> collected at 200 °C. LA: Lewis acid.

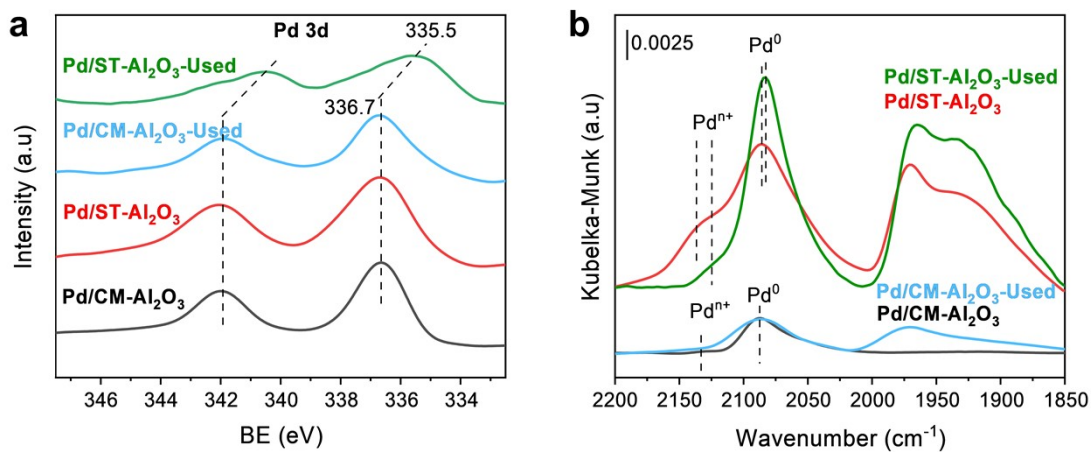

Fig. S2. (a) Pd 3d XPS, and (b) CO-FTIR of Pd/CM-Al<sub>2</sub>O<sub>3</sub>, Pd/ST-Al<sub>2</sub>O<sub>3</sub>, Pd/CM-Al<sub>2</sub>O<sub>3</sub>-Used, and Pd/ST-Al<sub>2</sub>O<sub>3</sub>-Used. BE: binding energy.

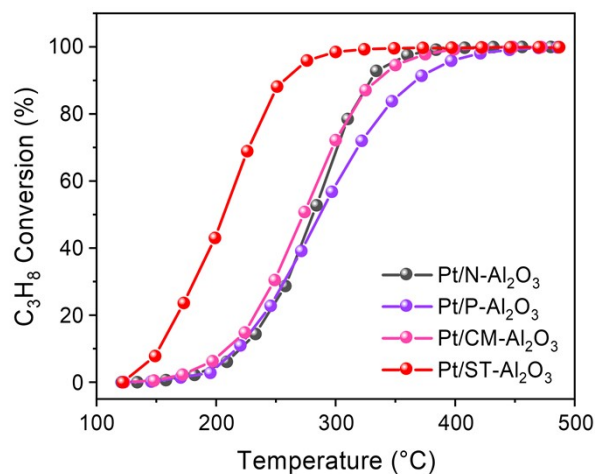

Fig. S3. The complete propane oxidation activity comparison with other Pt/Al<sub>2</sub>O<sub>3</sub> catalysts. All the curves were obtained after three reaction cycles. (The complete propane oxidation activity test condition: 0.2 vol.% C<sub>3</sub>H<sub>8</sub> + 1 vol.% O<sub>2</sub> + N<sub>2</sub> balance, 50 mL/min total flow, 0.1 g catalyst, WHSV = 30,000 mL·g<sup>-1</sup>·h<sup>-1</sup>.)

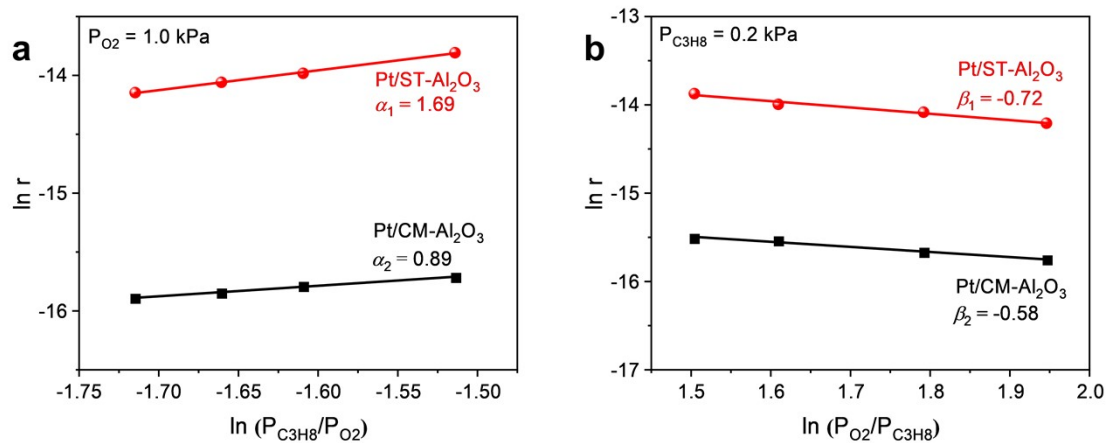

Fig. S4. The (a) propane and (b) oxygen orders of Pt/CM- $Al_2O_3$  and Pt/ST- $Al_2O_3$ . Test temperature: 220 °C.

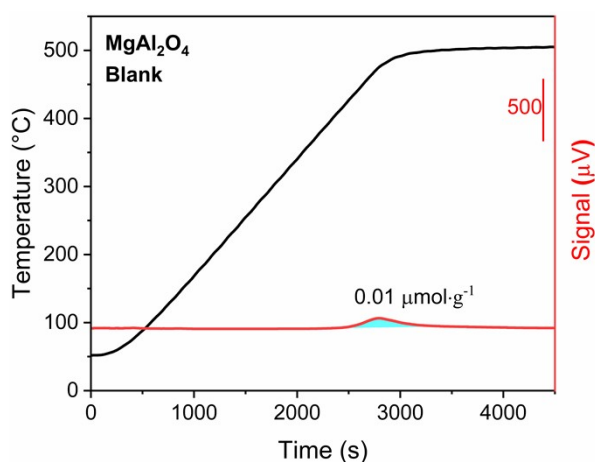

Fig. S5. The blank experiment profile of C<sub>3</sub>H<sub>8</sub>-TPD.

To evaluate the possible effect induced by residual carbonates of sample, we prepared a more basic sample MgAl<sub>2</sub>O<sub>4</sub> by the reported method<sup>1</sup>, to perform a blank experiment. The blank experiment procedure was identical to the original C<sub>3</sub>H<sub>8</sub>-TPD, except that the propane adsorption step was absent. As shown in Fig. S5, the residual carbonates contributed a desorption signal equivalent to only 0.01 µmol·g<sup>-1</sup> propane, much lower than the desorption propane amounts of CM-Al<sub>2</sub>O<sub>3</sub> (0.19 µmol·g<sup>-1</sup>), proving the reliability of C<sub>3</sub>H<sub>8</sub>-TPD experiment.

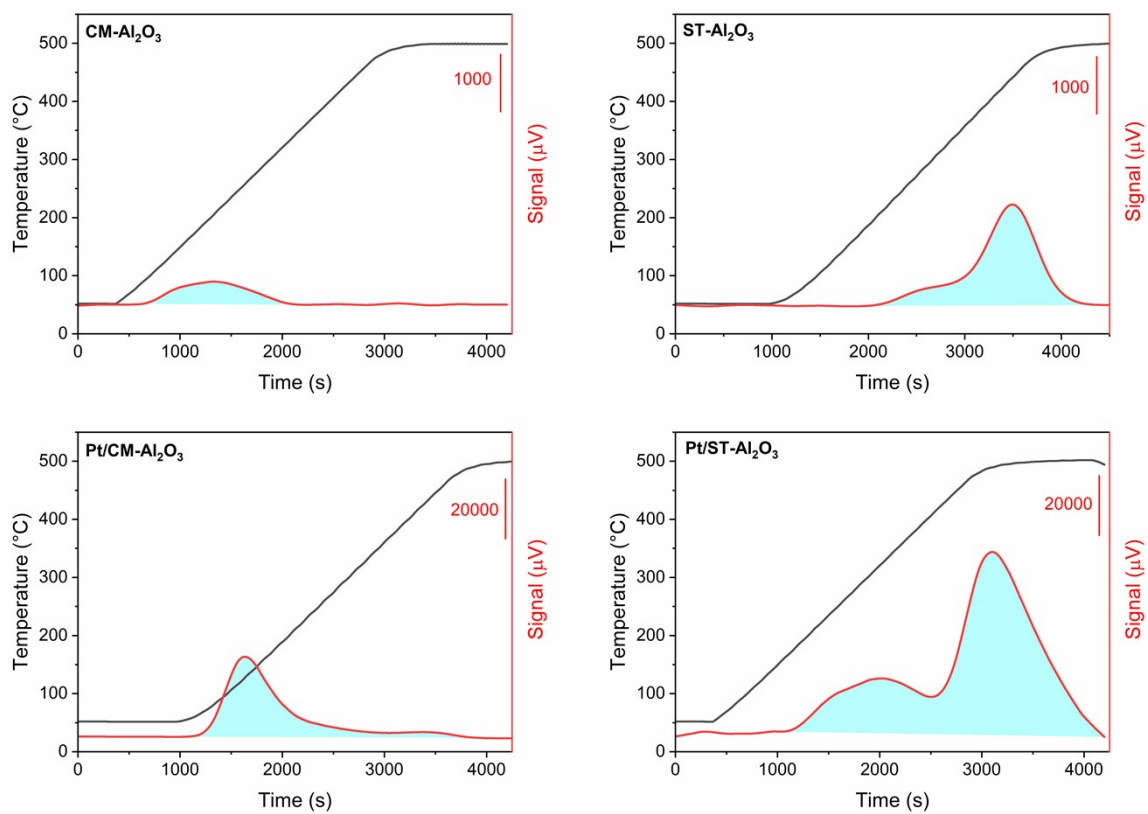

Fig. S6.  $C_3H_8$ -TPD profiles of (a) CM- $Al_2O_3$ , (b) ST- $Al_2O_3$ , (c) Pt/CM- $Al_2O_3$ , and (d) Pt/ST- $Al_2O_3$ .

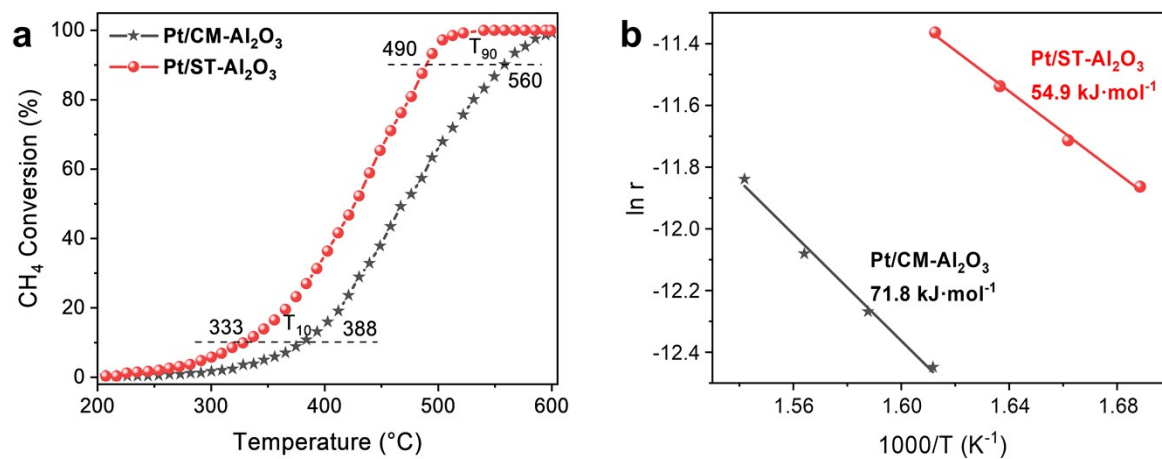

Fig. S7. (a) The complete methane oxidation activity curves, and (b) apparent activation energies. (The complete methane oxidation activity test condition: 0.2 vol.% CH<sub>4</sub> + 1 vol.% O<sub>2</sub> + N<sub>2</sub> balance, 50 mL/min total flow, 0.1 g catalyst, WHSV = 30,000 mL·g<sup>-1</sup>·h<sup>-1</sup>.)



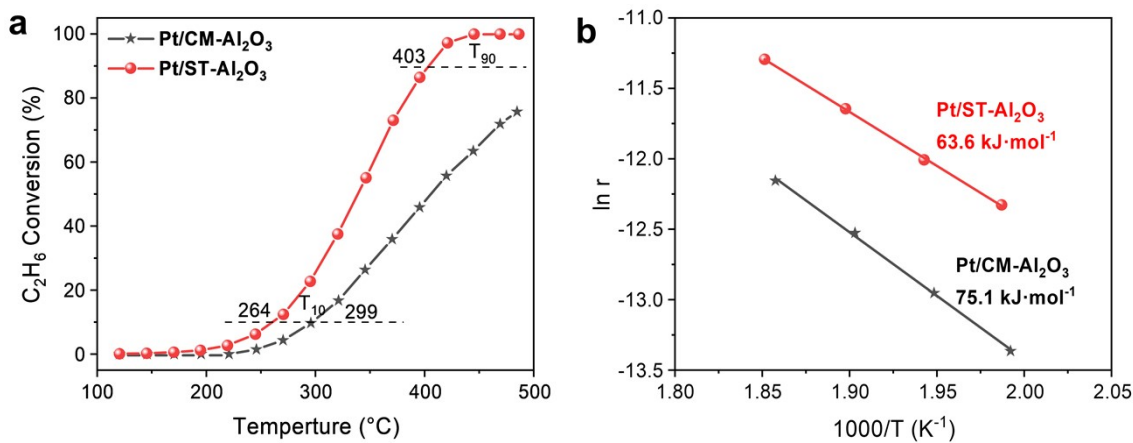

Fig. S8. (a) The complete ethane oxidation activity curves, and (b) apparent activation energies. (The complete ethane oxidation activity test condition: 0.2 vol.% C<sub>2</sub>H<sub>6</sub> + 1 vol.% O<sub>2</sub> + N<sub>2</sub> balance, 50 mL/min total flow, 0.1 g catalyst, WHSV = 30,000 mL·g<sup>-1</sup>·h<sup>-1</sup>.)

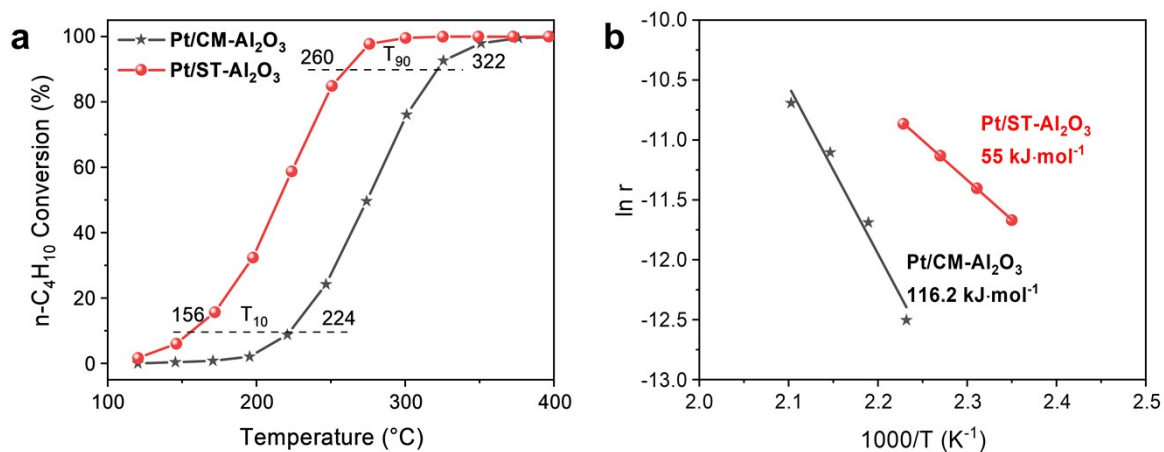

Fig. S9. (a) The complete n-butane oxidation activity curves, and (b) apparent activation energies. (The complete n-butane oxidation activity test condition: 0.2 vol.% n-C<sub>4</sub>H<sub>10</sub> + 2 vol.% O<sub>2</sub> + N<sub>2</sub> balance, 50 mL/min total flow, 0.1 g catalyst, WHSV = 30,000 mL·g<sup>-1</sup>·h<sup>-1</sup>.)

Table. S1. The physical-chemical parameters of Pd/CM-Al<sub>2</sub>O<sub>3</sub> and Pd/ST-Al<sub>2</sub>O<sub>3</sub>.

| Catalyst                             | Pd Contents<br>(wt%) <sup>a</sup> | Pd Dispersion<br>D (%) <sup>b</sup> |
|--------------------------------------|-----------------------------------|-------------------------------------|
| Pd/CM-Al <sub>2</sub> O <sub>3</sub> | 0.82                              | 17.6                                |
| Pd/ST-Al <sub>2</sub> O <sub>3</sub> | 0.82                              | 58.0                                |

<sup>a</sup> Measured by ICP-OES.

<sup>b</sup> Calculated by CO pulse chemisorption experiment.

Table. S2. Quantified data from C<sub>3</sub>H<sub>8</sub>-TPD (Fig. S6).

| Sample                                                                 | CM-Al <sub>2</sub> O <sub>3</sub> | ST-Al <sub>2</sub> O <sub>3</sub> | Pt/CM-Al <sub>2</sub> O <sub>3</sub> | Pt/ST-Al <sub>2</sub> O <sub>3</sub> |
|------------------------------------------------------------------------|-----------------------------------|-----------------------------------|--------------------------------------|--------------------------------------|
| C <sub>3</sub> H <sub>8</sub> Desorbed Amounts (μmol·g <sup>-1</sup> ) | 0.19                              | 0.73                              | 10.5                                 | 40.1                                 |
| Desorbed C <sub>3</sub> H <sub>8</sub> per Surface Pt atom             | -                                 | -                                 | 0.44                                 | 1.44                                 |

1. F. Wang, W.-Z. Li, J.-D. Lin, Z.-Q. Chen and Y. Wang, *Appl. Catal., B*, 2018, **231**, 292-298.
